# Supplementary material
Source: PubMed Central journal article supplement (PMC2731693)
Supplement: NIHMS134175-supplement-01.pdf [file NIHMS134175-supplement-01.pdf]

**Table A. MALDI-TOF MS Analyses and CgA Proteins**

| Spot Series | Spot # within Each Series | % Sequence coverage | Protein ID        |
|-------------|---------------------------|---------------------|-------------------|
| CgA-I       | a                         | 30                  | CgA*              |
|             | b                         | 15                  | CgA               |
|             | c                         | 45                  | CgA               |
|             | d                         | 41                  | CgA <sup>#</sup>  |
|             | e                         | 19                  | CgA               |
| CgA-II      | a                         | 24                  | CgA               |
|             | b                         | 24                  | CgA               |
|             | c                         | 49                  | CgA               |
|             | d                         | 48                  | CgA               |
|             | e                         | 48                  | CgA <sup>#</sup>  |
|             | f                         | 45                  | CgA               |
|             | g                         | 64                  | CgA <sup>#</sup>  |
| CgA-III     | a                         | 28                  | CgA               |
|             | b                         | 43                  | CgA               |
|             | c                         | 25                  | CgA               |
|             | d                         | 35                  | CgA               |
|             | e                         | 13                  | CgA               |
|             | f                         | 32                  | CgA               |
|             | g                         | 5                   | CgA               |
|             | h                         | 27                  | CgA <sup>#</sup>  |
|             | I                         | 33                  | CgA               |
|             | j                         | 35                  | CgA               |
| CgA-IV      | a                         | 11                  | CgA* <sup>#</sup> |
| CgA-V       | a                         | 17                  | CgA               |
| CgA-VI      | a                         | 18                  | CgA               |
|             | b                         | 11                  | CgA <sup>#</sup>  |
|             | c                         | 14                  | CgA <sup>#</sup>  |
|             | d                         | 8                   | CgA               |
|             | e                         | 18                  | CgA               |
| CgA-VII     | a                         | 10                  | CgA* <sup>#</sup> |
| CgA-VIII    | a                         | 8                   | CgA*              |
|             | b                         | 14                  | CgA <sup>#</sup>  |
|             | c                         | 13                  | CgA <sup>#</sup>  |
|             | d                         | 9                   | CgA <sup>#</sup>  |
|             | e                         | 12                  | CgA               |
| CgA-IX      | a                         | 17                  | CgA               |

**Table B. MALDI-TOF MS Analyses and CgB Proteins**

| Spot Series | Spot #<br>w/in Series | % Sequence<br>coverage | Protein ID        |
|-------------|-----------------------|------------------------|-------------------|
| CgB-I       | a                     | 12                     | CgB               |
|             | b                     | 14                     | CgB               |
|             | c                     | 7                      | CgB               |
| CgB-II      | a                     | 15                     | CgB               |
|             | b                     | 9                      | CgB*              |
| CgB-III     | a                     | 18                     | CgB               |
|             | b                     | 16                     | CgB               |
|             | c                     | 19                     | CgB <sup>#</sup>  |
|             | d                     | 15                     | CgB               |
|             | e                     | 13                     | CgB               |
| CgB-IV      | a                     | 16                     | CgB               |
|             | b                     | 12                     | CgB               |
|             | c                     | 18                     | CgB               |
|             | d                     | 21                     | CgB               |
|             | e                     | 14                     | CgB               |
| CgB-V       | a                     | 11                     | CgB*              |
|             | b                     | 20                     | CgB               |
|             | c                     | 14                     | CgB               |
| CgB-VI      | a                     | 15                     | CgB               |
|             | b                     | 11                     | CgB* <sup>#</sup> |
|             | c                     | 13                     | CgB <sup>#</sup>  |
| CgB-VII     | a                     | 12                     | CgB               |
|             | b                     | 15                     | CgB               |
|             | c                     | 18                     | CgB               |
| CgB-VIII    | a                     | 9                      | CgB*              |
|             | b                     | 9                      | CgB               |
|             | c                     | 10                     | CgB*              |
|             | d                     | 20                     | CgB <sup>#</sup>  |
|             | e                     | 11                     | CgB <sup>#</sup>  |
|             | f                     | 10                     | CgB*              |
|             | g                     | 14                     | CgB <sup>#</sup>  |
| CgB-IX      | a                     | 13                     | CgB               |
|             | b                     | 15                     | CgB <sup>#</sup>  |
|             | c                     | 12                     | CgB <sup>#</sup>  |

**Table C. MALDI-TOF MS Analyses and ProSAAS Proteins**

| Spot Series | Spot # w/in Series | % Sequence coverage | Protein ID       |
|-------------|--------------------|---------------------|------------------|
| proSAAS     | a                  | 21                  | CgA              |
|             | b                  | 22 <sup>#</sup>     | CgA <sup>#</sup> |
